# Supplementary figures and images for: Human Factors in Emergency Department eCPR: A Prospective Observational Study of Teamwork, Stress and Environmental Demands
Source: Research Square preprint supplement (doi:10.21203/rs.3.rs-8216191/v1), 2025-12-22

**Appendix 2 - Data Collection Sheet - Emergency Department eCPR**

**
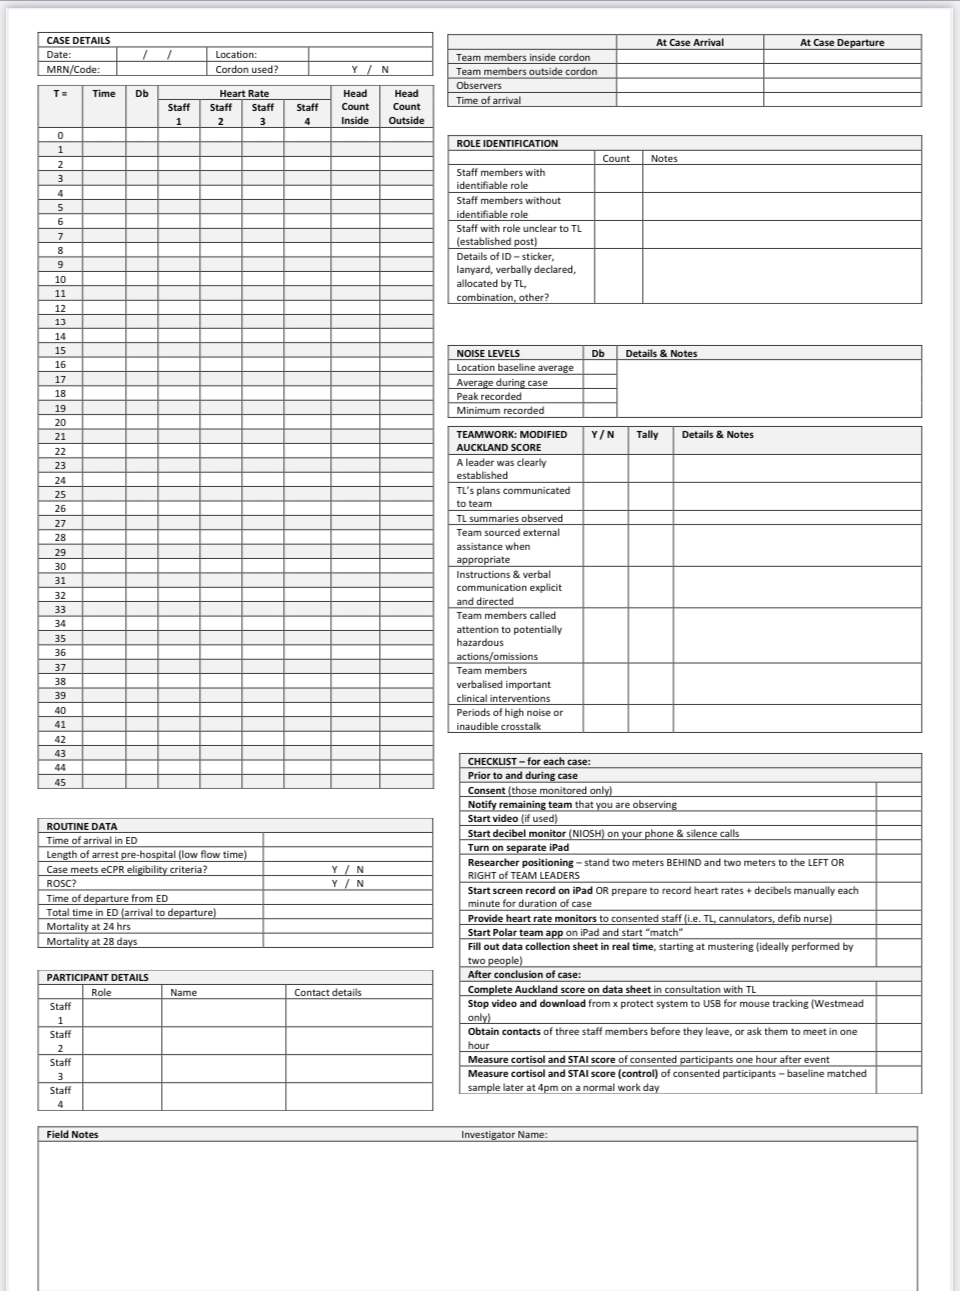
**

Supplement: Supplementary file 1 [file 3fa7ab1426182f85422e4fd3.docx]

**Appendix 1 - Pilot Study Dataset**
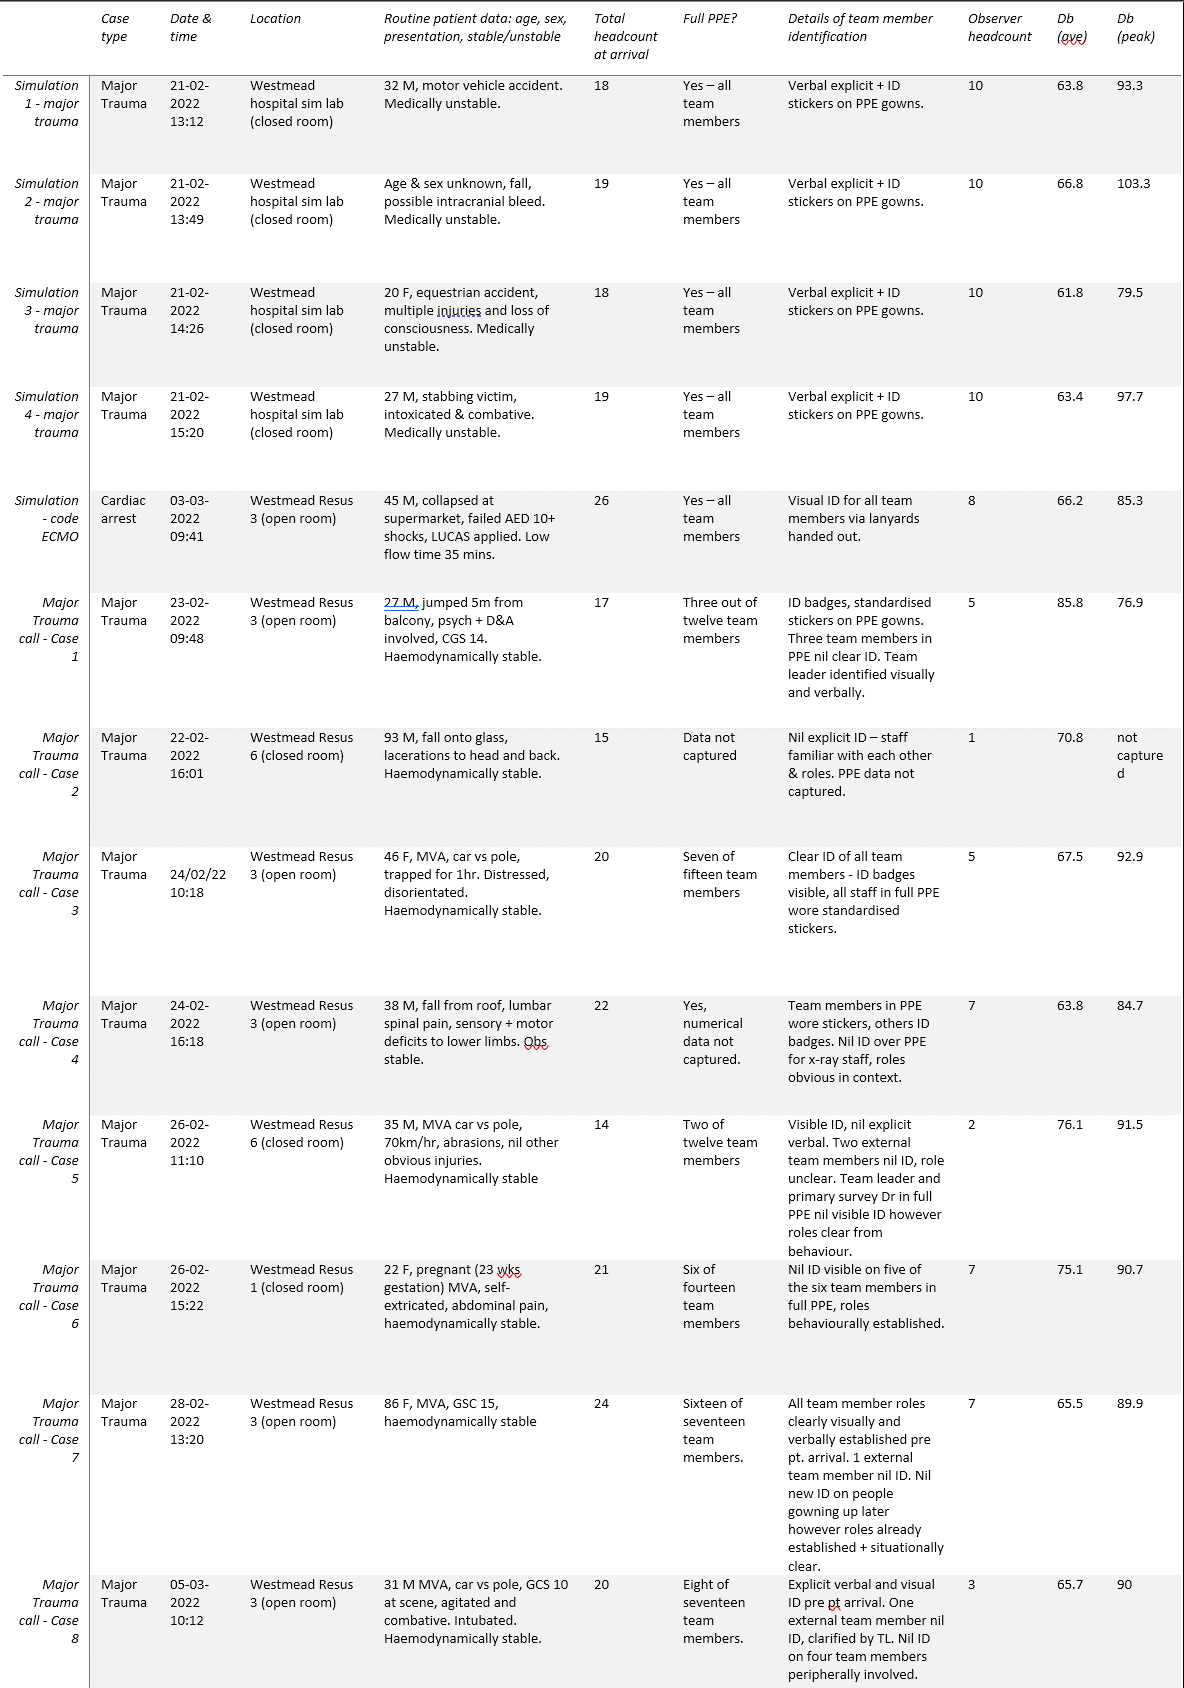

Supplement: Supplementary file 3 [file c8482c93f908688779b167c1.docx]
